# Supplementary material
Source: publisher figshare collection journal article supplement (https://diabetesjournals.figshare.com/articles/dataset/_/20405490)
Supplement: Supplementary file 1 [file 1]

## **The TEDDY Study Group**

**Colorado Clinical Center:** Marian Rewers, M.D., Ph.D., PI<sup>1,4,6,9,10</sup>, Aaron Barbour, Kimberly Bautista<sup>11</sup>, Judith Baxter<sup>8,9,11</sup>, Daniel Felipe-Morales, Brigitte I. Frohnert, M.D.<sup>2,13</sup>, Marisa Stahl, M.D.<sup>12</sup>, Patricia Gesualdo<sup>2,6,11,13</sup>, Michelle Hoffman<sup>11,12,13</sup>, Rachel Karban<sup>11</sup>, Edwin Liu, M.D.<sup>12</sup>, Alondra Munoz, Jill Norris, Ph.D.<sup>2,3,11</sup>, Holly O'Donnell, Ph.D.<sup>8</sup>, Stesha Peacock, Hanan Shorosh, Andrea Steck, M.D.<sup>3,13</sup>, Megan Stern<sup>11</sup>, Kathleen Waugh<sup>6,7,11</sup>. University of Colorado, Anschutz Medical Campus, Barbara Davis Center for Childhood Diabetes.

**Finland Clinical Center:** Jorma Toppari, M.D., Ph.D., PI<sup>¥^1,4,10,13</sup>, Olli G. Simell, M.D., Ph.D., Annika Adamsson, Ph.D.<sup>^11</sup>, Sanna-Mari Aaltonen<sup>^</sup>, Suvi Ahonen<sup>\*±§</sup>, Mari Åkerlund<sup>\*±§</sup>, Leena Hakola<sup>\*±</sup>, Anne Hekkala, M.D.<sup>μx</sup>, Henna Holappa<sup>μx</sup>, Heikki Hyöty, M.D., Ph.D.<sup>\*±6</sup>, Anni Ikonen<sup>μx</sup>, Jorma Ilonen, M.D., Ph.D.<sup>¥13</sup>, Sanna Jokipuu<sup>^</sup>, Leena Karlsson<sup>^</sup>, Jukka Kero M.D., Ph.D.<sup>¥^3, 13</sup>, Jaakko J. Koskeniemi M.D., Ph.D.<sup>¥^</sup>, Miia Kähönen<sup>μx11,13</sup>, Mikael Knip, M.D., Ph.D.<sup>\*±</sup>, Minna-Liisa Koivikko<sup>μx</sup>, Katja Kokkonen<sup>\*±</sup>, Merja Koskinen<sup>\*±</sup>, Mirva Koreasalo<sup>\*±§2</sup>, Kalle Kurppa, M.D., Ph.D.<sup>\*±12</sup>, Salla Kuusela, M.D.<sup>\*±</sup>, Jarita Kytölä<sup>\*±</sup>, Jutta Laiho, Ph.D.<sup>\*6</sup>, Tiina Latva-aho<sup>μx</sup>, Laura Leppänen<sup>^</sup>, Katri Lindfors, Ph.D.<sup>\*12</sup>, Maria Lönnrot, M.D., Ph.D.<sup>\*±6</sup>, Elina Mäntymäki<sup>^</sup>, Markus Mattila<sup>\*±</sup>, Maija Miettinen<sup>§2</sup>, Katja Multasuo<sup>μx</sup>, Teija Mykkänen<sup>μx</sup>, Tiina Niininen<sup>±\*11</sup>, Sari Niinistö<sup>§2</sup>, Mia Nyblom<sup>\*±</sup>, Sami Oikarinen, Ph.D.<sup>\*±6</sup>, Paula Ollikainen<sup>μx</sup>, Zhian Othmani<sup>¥</sup>, Sirpa Pohjola<sup>μx</sup>, Jenna Rautanen<sup>±§</sup>, Anne Riikonen<sup>\*±§2</sup>, Minna Romo<sup>^</sup>, Satu Simell, M.D., Ph.D.<sup>¥12</sup>, Päivi Tossavainen, M.D.<sup>μx</sup>, Mari Vähä-Mäkilä<sup>¥</sup>, Eeva Varjonen<sup>^11</sup>, Riitta Veijola, M.D., Ph.D.<sup>μx13</sup>, Irene Viinikangas<sup>μx</sup>, Suvi M. Virtanen, M.D., Ph.D.<sup>\*±§2</sup>. ¥University of Turku, \*Tampere University, <sup>μ</sup>University of Oulu, <sup>^</sup>Turku University Hospital, Hospital District of Southwest Finland, <sup>±</sup>Tampere University Hospital, <sup>°</sup>Oulu University Hospital, <sup>§</sup>Finnish Institute for Health and Welfare, Finland, <sup>¶</sup>University of Kuopio.

**Georgia/Florida Clinical Center:** Jin-Xiong She, Ph.D., PI<sup>1,3,4,10</sup>, Desmond Schatz, M.D.<sup>\*4,7,8</sup>, Diane Hopkins<sup>11</sup>, Leigh Steed<sup>11,12,13</sup>, Jennifer Bryant<sup>11</sup>, Katherine Silvis<sup>2</sup>, Michael Haller, M.D.<sup>\*13</sup>, Melissa Gardiner<sup>11</sup>, Richard McIndoe, Ph.D., Ashok Sharma, Stephen W. Anderson, M.D.<sup>^</sup>, Laura Jacobsen, M.D.<sup>\*13</sup>, John Marks, DHSc.<sup>\*11,13</sup>, P.D. Towe\*. Center for Biotechnology and Genomic Medicine, Augusta University. \*University of Florida, Pediatric Endocrinology. <sup>^</sup>Pediatric Endocrine Associates, Atlanta.

**Germany Clinical Center:** Anette G. Ziegler, M.D., PI<sup>1,3,4,10</sup>, Ezio Bonifacio Ph.D.\*<sup>^</sup>, Cigdem Gezginci, Anja Heublein, Eva Hohoff<sup>¥2</sup>, Sandra Hummel, Ph.D.<sup>2</sup>, Annette Knopff<sup>7</sup>, Charlotte Koch, Sibylle Koletzko, M.D.<sup>¶12</sup>, Claudia Ramminger<sup>11</sup>, Roswith Roth, Ph.D.<sup>8</sup>, Jennifer Schmidt, Marlon Scholz, Joanna Stock<sup>8,11,13</sup>, Katharina Warncke, M.D.<sup>13</sup>, Lorena Wendel, Christiane Winkler, Ph.D.<sup>2,11</sup>. Forschergruppe Diabetes e.V. and Institute of Diabetes Research, Helmholtz Zentrum München, Forschergruppe Diabetes, and Klinikum rechts der Isar, Technische Universität München. \*Center for Regenerative Therapies, TU Dresden, <sup>¶</sup>Dr. von Hauner Children's Hospital, Department of Gastroenterology, Ludwig Maximilians University Munich, <sup>¥</sup>University of Bonn, Department of Nutritional Epidemiology.

**Sweden Clinical Center:** Åke Lernmark, Ph.D., PI<sup>1,3,4,5,6,8,9,10</sup>, Daniel Agardh, M.D., Ph.D.<sup>6,12</sup>, Carin Andrén Aronsson, Ph.D.<sup>2,11,12</sup>, Rasmus Bennet, Corrado Cilio, Ph.D., M.D.<sup>6</sup>, Susanne Dahlberg, Ulla Fält, Malin Goldman Tsubarah, Emelie Ericson-Hallström, Lina Fransson, Thomas Gard, Emina Halilovic, Gunilla Holmén, Susanne Hyberg, Berglind Jonsdottir, M.D., Ph.D.<sup>11</sup>, Naghmeh Karimi, Helena Elding Larsson, M.D., Ph.D.<sup>6,13</sup>, Marielle Lindström, Markus Lundgren, M.D., Ph.D.<sup>13</sup>, Marlena Maziarz, Ph.D., Maria Månsson Martinez, Jessica Melin<sup>11</sup>, Zeliha Mestan, Caroline Nilsson, Yohanna Nordh, Kobra Rahmati, Anita Ramelius, Falastin Salami, Anette Sjöberg, Carina Törn, Ph.D.<sup>3</sup>, Ulrika Ulvenhag, Terese Wiktorsson, Åsa Wimar<sup>13</sup>. Lund University.

**Washington Clinical Center:** William A. Hagopian, M.D., Ph.D., PI<sup>1,3,4,6,7,10,12,13</sup>, Michael Killian<sup>6,7,11,12</sup>, Claire Cowen Crouch<sup>11,13</sup>, Jennifer Skidmore<sup>2</sup>, Luka-Sophia Bowen, Mikeil Metcalf, Arlene Meyer, Jocelyn Meyer, Denise Mulenga<sup>11</sup>, Nole Powell, Jared Radtke, Shreya Roy, Davey Schmitt, Preston Tucker. Pacific Northwest Research Institute.

**Pennsylvania Satellite Center:** Dorothy Becker, M.D., Margaret Franciscus, MaryEllen Dalmagro-Elias Smith<sup>2</sup>, Ashi Daftary, M.D., Mary Beth Klein, Chrystal Yates. Children's Hospital of Pittsburgh of UPMC.

**Data Coordinating Center:** Jeffrey P. Krischer, Ph.D., PI<sup>1,4,5,9,10</sup>, Rajesh Adusumali, Sarah Austin-Gonzalez, Maryouri Avendano, Sandra Baethke, Brant Burkhardt, Ph.D.<sup>6</sup>, Martha Butterworth<sup>2</sup>, Nicholas Cadigan, Joanna Clasen, Kevin Counts, Laura Gandolfo, Jennifer Garmeson, Veena Gowda, Christina Karges, Shu Liu, Xiang Liu, Ph.D.<sup>2,3,8,13</sup>, Kristian Lynch, Ph.D.<sup>6,8</sup>, Jamie Malloy, Lazarus Mramba, Ph.D.<sup>2</sup>, Cristina McCarthy<sup>11</sup>, Jose Moreno, Hemang M. Parikh, Ph.D.<sup>3,8</sup>, Cassandra Remedios, Chris Shaffer, Susan Smith<sup>11</sup>, Noah Sulman, Ph.D., Roy Tamura, Ph.D.<sup>1,2,11,12,13</sup>, Dena Tewey, Michael Toth, Ulla Uusitalo, Ph.D.<sup>2</sup>, Kendra Vehik, Ph.D.<sup>4,5,6,8,13</sup>, Ponni Vijayakandipan, Melissa Wroble, Jimin Yang, Ph.D., R.D.<sup>2</sup>, Kenneth Young, Ph.D. *Past staff: Michael Abbondandolo, Lori Ballard, Rasheedah Brown, David Cuthbertson, Stephen Dankyi, Christopher Eberhard, Steven Fiske, David Hadley, Ph.D., Kathleen Heyman, Belinda Hsiao, Francisco Perez Laras, Hye-Seung Lee, Ph.D., Qian Li, Ph.D., Colleen Maguire, Wendy McLeod, Aubrie Merrell, Steven Meulemans, Ryan Quigley, Laura Smith, Ph.D..* University of South Florida.

**Project scientist:** Beena Akolkar, Ph.D.<sup>1,3,4,5,6,7,9,10</sup>. National Institutes of Diabetes and Digestive and Kidney Diseases.

**Autoantibody Reference Laboratories:** Liping Yu, M.D.<sup>^5</sup>, Dongmei Miao, M.D.<sup>^</sup>, Kathleen Gillespie<sup>\*5</sup>, Kyla Chandler\*, Ilana Kelland\*, Yassin Ben Khoud\*, Matthew Randell \*. <sup>^</sup>Barbara Davis Center for Childhood Diabetes, University of Colorado Denver, \*Bristol Medical School, University of Bristol, UK.

**HbA1c Laboratory:** Randie R. Little, Ph.D., Curt Rohlfing. Diabetes Diagnostic Laboratory, Dept. of Pathology, University of Missouri School of Medicine.

**HLA Reference Laboratory:** William Hagopian<sup>3</sup>, M.D., Ph.D., Jared Radtke, Preston Tucker. Pacific Northwest Research Institute, Seattle WA. (Previously Henry Erlich, Ph.D.<sup>3</sup>, Steven J. Mack, Ph.D., Anna Lisa Fear. Center for Genetics, Children's Hospital Oakland Research Institute.)

**OGTT Laboratory:** William E. Winter, M.D., David L. Pittman. UF Health Pathology Laboratories' (UFHPL) Endocrinology Laboratory, University of Florida, Gainesville, Florida, USA. (Previously Santica M. Marcovina, Ph.D., Sc.D., Andrew N. Hoofnagle, M.D., Ph.D., Northwest Lipid Metabolism and Diabetes Research Laboratories, University of Washington.)

**Repository:** Sandra Ke, Niveen Mulholland, Ph.D. NIDDK Biosample Repository at Fisher BioServices.

**Other contributors:** Thomas Briese, Ph.D.<sup>6</sup>, Columbia University. Todd Brusko, Ph.D.<sup>5</sup>, University of Florida. Suzanne Bennett Johnson, Ph.D.<sup>8,11</sup>, Florida State University. Eoin McKinney, Ph.D.<sup>5</sup>, University of Cambridge. Tomi Pastinen, M.D., Ph.D.<sup>5</sup>, The Children's Mercy Hospital. Eric Triplett, Ph.D.<sup>6</sup>, University of Florida.

**Committees:**

<sup>1</sup>Ancillary Studies, <sup>2</sup>Diet, <sup>3</sup>Genetics, <sup>4</sup>Human Subjects/Publicity/Publications, <sup>5</sup>Immune Markers, <sup>6</sup>Infectious Agents, <sup>7</sup>Laboratory Implementation, <sup>8</sup>Psychosocial, <sup>9</sup>Quality Assurance, <sup>10</sup>Steering, <sup>11</sup>Study Coordinators, <sup>12</sup>Celiac Disease, <sup>13</sup>Clinical Implementation.
